# Supplementary material for: A new kind of nanocomposite Xuan paper comprising ultralong hydroxyapatite nanowires and cellulose fibers with a unique ink wetting performance
Source: Royal Society of Chemistry journal article supplement (doi:10.1039/c9ra08349a), 2019-01-01
Supplement: c9ra08349a1.pdf [file c9ra08349a1.pdf]

## Supporting Information

### **A New Kind of Nanocomposite Xuan Paper Comprising Ultralong Hydroxyapatite Nanowires and Cellulose Fibers with Unique Ink Wetting Performance**

Yue-Ting Shao<sup>1,2</sup>, Ying-Jie Zhu<sup>\*,1,2</sup>, Li-Ying Dong<sup>\*,1</sup>, Qiang-Qiang Zhang<sup>1,2</sup>

<sup>1</sup> *State Key Laboratory of High Performance Ceramics and Superfine Microstructure, Shanghai Institute of Ceramics, Chinese Academy of Sciences, 1295 Dingxi Road, Shanghai 200050, P. R. China*

<sup>2</sup> *Center of Materials Science and Optoelectronics Engineering, University of Chinese Academy of Sciences, Beijing 100049, P. R. China*

E-mail: [y.j.zhu@mail.sic.ac.cn](mailto:y.j.zhu@mail.sic.ac.cn); [lydong@mail.sic.ac.cn](mailto:lydong@mail.sic.ac.cn)

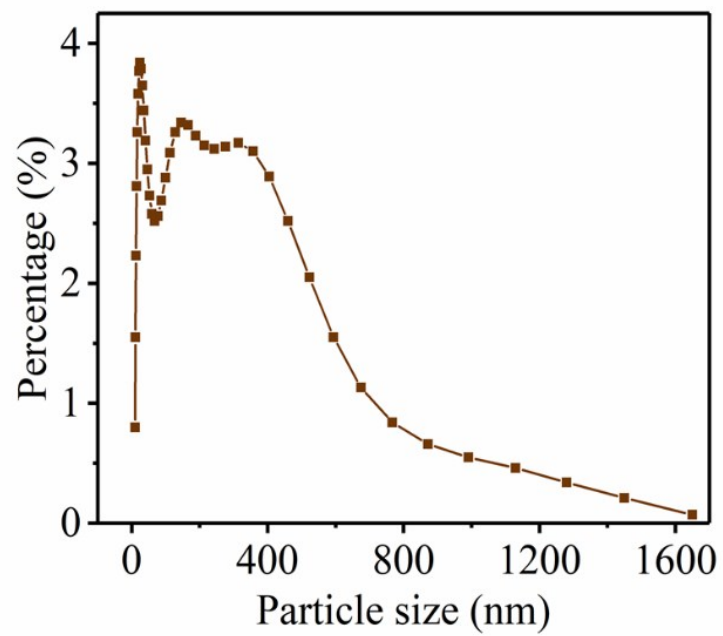

**Figure S1** Particle size distribution curve of a commercial Chinese ink
